# Supplementary material
Source: Springer Nature journal article supplement (https://www.springermedizin.de/resource/supplementary/12889_2008_1491_MOESM9_ESM.pdf/9504408)
Supplement: MOESM9 [file 9504408]

### Overweight

### Obese

0.5 1 2 4 16

0.5 1 2 4 16 32

| Study                   | Obesity | Sex | Age   | F-up | Country     | N      | Outcome | Risk Est (95% CI)  | Risk Est (95% CI)  |
|-------------------------|---------|-----|-------|------|-------------|--------|---------|--------------------|--------------------|
| Rapp (2005) [45]        | BMI     | M   | 35-54 | 9.6  | Austria     | 67447  | IRR     | 1.65 (1.45 - 1.86) | 1.41 (1.14 - 1.74) |
| Engeland (2003) [70]    | BMI     | M   | 20-74 | 21   | Norway      | 951459 | IRR     | 1.40 (1.37 - 1.43) | 1.46 (1.40 - 1.54) |
| Lund Nilsen (1999) [71] | BMI     | M   | 40+   | 10.4 | Norway      | 2411   | IRR     | 1.08 (0.91 - 1.29) | 1.22 (0.99 - 1.50) |
| Zeegers (2005) [72]     | BMI     | M   | 55-69 | 9.3  | Netherlands | 2335   | IRR     | 1.05 (0.94 - 1.17) | 0.82 (0.60 - 1.13) |
| Jonsson (2003) [36]     | BMI     | M   | 44-83 | 22   | Sweden      | 8998   | IRR     | 1.00 (0.80 - 1.20) | 1.00 (0.60 - 1.50) |
| Lukanova (2006) [42]    | BMI     | M   | 30-60 | 8.2  | Sweden      | 33424  | IRR     | 0.97 (0.80 - 1.17) | 0.77 (0.56 - 1.07) |
| Giovannucci (1997) [73] | BMI     | M   | 40-75 | 7.2  | US          | 46694  | IRR     | 0.95 (0.85 - 1.06) | 0.76 (0.62 - 0.91) |
| Rapp (2005) [45]        | BMI     | M   | 35-54 | 9.6  | Austria     | 67447  | RR-P    | 1.65 (1.46 - 1.86) | 1.30 (1.06 - 1.60) |
| Habel (2000) [74]       | BMI     | M   | 18-84 | 19.5 | US          | 70712  | RR-P    | 1.30 (1.17 - 1.45) | 1.15 (1.02 - 1.31) |
| Lukanova (2006) [42]    | BMI     | M   | 30-60 | 8.2  | Sweden      | 33424  | RR-P    | 1.24 (1.03 - 1.51) | 0.96 (0.69 - 1.33) |
| Lund Nilsen (1999) [71] | BMI     | M   | 40+   | 10.4 | Norway      | 2411   | RR-P    | 1.10 (0.92 - 1.31) | 1.20 (0.98 - 1.48) |

|                          |            |                    |                    |
|--------------------------|------------|--------------------|--------------------|
| IRR: All studies (7)     | 102.4(0)*  | 1.14 (1.00 - 1.31) | 1.05 (0.85 - 1.30) |
| RR-P: All studies (4)    | 16.6(0)*   | 1.32 (1.14 - 1.53) | 1.17 (1.06 - 1.30) |
| IRR: F-up<10 yrs (4)     | 49.1(0)*   | 1.12 (0.90 - 1.41) | 0.91 (0.69 - 1.20) |
| IRR: F-up>=10 yrs (3)    | 16.9(0)*   | 1.18 (0.99 - 1.40) | 1.27 (1.10 - 1.47) |
| RR-P: F-up<10 yrs (2)    | 5.9(0.02)* | 1.45 (1.19 - 1.78) | 1.14 (0.88 - 1.47) |
| RR-P: F-up>=10 yrs (2)   | 2.6(0.11)* | 1.24 (1.12 - 1.37) | 1.17 (1.05 - 1.30) |
| IRR: min.age<40 (3)      | 20.7(0)*   | 1.28 (1.01 - 1.61) | 1.27 (0.92 - 1.75) |
| IRR: min.age>=40 (4)     | 2.2(0.52)* | 1.02 (0.94 - 1.11) | 0.93 (0.75 - 1.16) |
| IRR: Europe studies (6)  | 61.7(0)*   | 1.17 (1.01 - 1.36) | 1.14 (0.93 - 1.39) |
| RR-P: Europe studies (3) | 15.7(0)*   | 1.32 (1.08 - 1.62) | 1.19 (1.03 - 1.38) |

0.5 1 2 4 16

0.5 1 2 4 16 32

RR

RR
